# Supplementary material for: 新《企业所得税税法》与新《所得税会计准则》差异刍议
Source: HighWire-hosted journal article supplement (doi:10.1136/jitc-2022-005116), 2009-01-01
Supplement: jitc-2022-005116supp007_data_supplement.pdf [file jitc-2022-005116supp007_data_supplement.pdf]

**Supplementary Table 1. PCR primer sequences for mutagenesis (5'→3').**

|                   |                                                              |
|-------------------|--------------------------------------------------------------|
| shNC              | CCGGGCAAGCTGACCCTGAAGTTCATCTCGAGATGAACTTCAGGGTCAGCTTGCTTTTTT |
| shFBW7.1          | CCGGCCTAAAGAGTTGGCACTCTATCTCGAGATAGAGTGCCAACCTTTAGGTTTTT     |
| shFBW7.2          | CCGGTCAAACCAGGTGCAATTATTTCTCGAGAAATAATTGCACCTGGTTTGATTTTTG   |
| Myc-FBW7 ΔF F     | CAGTTTCAATGCAAAGAAGAGGGGATTG                                 |
| Myc-FBW7 ΔF R     | CTTCTTTGCATTGAAACTGGGGTTCTATC                                |
| Myc-FBW7 ΔWD40 F  | GTGCTGAAACTAGTCACATTGGAGAGTG                                 |
| Myc-FBW7 ΔWD40 R  | ATGTGACTAGTTTCAGCACCTTAGGAG                                  |
| Flag-PD-1 K210R F | GCCAGCCCCTGAGGGAGGACCCCTCAGCCGTGCCTGTGT                      |
| Flag-PD-1 K210R R | GGCTGAGGGGTCTCCCTCAGGGGCTGGCCGGTGCCCT                        |
| Flag-PD-1 K233R F | TTCCAGTGCGGAGAGAGGACCCCGGAGCCCCCGTGCCCT                      |
| Flag-PD-1 K233R R | TCCGGGGTCTCTCTCGCCACTGGAAATCCAGCT                            |
| Flag-PD-1 S261A F | ATGGGCACCTCAGCCCCGCCCCGAGGGGCTCAGCT                          |
| Flag-PD-1 S261A R | CCTGCGGGCGGGGGCTGAGGTGCCCATTCGCTAGGAAAG                      |
| Flag-PD-1 S261D F | GAATGGGCACCTCAGACCCCGCCCGAGGGGCTCAGCT                        |
| Flag-PD-1 S261D R | CTGCGGGCGGGGTCTGAGGTGCCATTCCGCTAGGAAAG                       |
| Flag-PD-1 ΔPEST F | GACCCCGGAGCCCCCGTGCCCCGAGGGGCTCAGCTGACGGCCCT                 |
| Flag-PD-1 ΔPEST R | CCGTCAGCTGAGCCCCTGCGGGGCACGGGGGGCTCCGGGGTCTT                 |
| Flag-PD-1 ΔNLS F  | CACGAGGGACAATAGGAGCCCCCGTGCCTGTGTCCCTGAG                     |
| Flag-PD-1 ΔNLS R  | TCAGGGACACAGGGCACGGGGGCTCCTATTGTCCCTCGTGC                    |

Supplementary Table 2. Antibody sources for Western blot, IP, IF and IHC.

| Antibody for Western blot                   | Brand & Catalog No.               | Dilution        |
|---------------------------------------------|-----------------------------------|-----------------|
| FBW7                                        | Santa Cruz, sc-33196              | 1/200           |
| Human PD-1                                  | Cell Signaling Technology, #86163 | 1/1000          |
| Mouse PD-1                                  | Proteintech, 66220-1-Ig           | 1/2000          |
| $\beta$ -actin                              | Cell Signaling Technology, #4970  | 1/1000          |
| $\alpha$ -tubulin                           | Cell Signaling Technology, #2125  | 1/2000          |
| Lamin A/C                                   | Boster, BA1227                    | 1/2000          |
| Ub                                          | R&D, MAB701                       | 1/1000          |
| CDK1                                        | Proteintech, 19532-1-AP           | 1/1000          |
| Importin $\alpha$                           | Proteintech, 18137-1-AP           | 1/2000          |
| Phosphoserine                               | Abcam, ab9332                     | 1/500           |
| Myc tag                                     | Abbkine, #A02060                  | 1/2000          |
| Flag tag                                    | Abbkine, #A02010                  | 1/2000          |
| His tag                                     | Abbkine, #A02050                  | 1/2000          |
| HA tag                                      | Abbkine, #A02040                  | 1/2000          |
| HRP-Rabbit IgG                              | Cell Signaling Technology, #7074  | 1/5000          |
| HRP-Mouse IgG                               | Cell Signaling Technology, #7076  | 1/5000          |
| <b>Antibody for IP</b>                      | <b>Brand &amp; Catalog No.</b>    | <b>Dilution</b> |
| Flag tag                                    | Sigma, F3165                      | 1/500           |
| PD-1                                        | Cell Signaling Technology, #86163 | 1/500           |
| FBW7                                        | Santa Cruz, sc-33196              | 1/50            |
| <b>Antibody for IF</b>                      | <b>Brand &amp; Catalog No.</b>    | <b>Dilution</b> |
| PD-1                                        | Cell Signaling Technology, #86163 | 1/200           |
| Goat Anti-Rabbit IgG H&L (Alexa Fluor® 594) | Abcam, ab150080                   | 1/500           |
| <b>Antibody for FCM</b>                     | <b>Brand &amp; Catalog No.</b>    | <b>Dilution</b> |
| PD-1                                        | Abcam, ab279695                   | 1/500           |
| <b>Antibody for IHC</b>                     | <b>Brand &amp; Catalog No.</b>    | <b>Dilution</b> |
| FBW7                                        | Santa Cruz, sc-33196              | 1/50            |
| Human PD-1                                  | Cell Signaling Technology, #86163 | 1/200           |
| Mouse PD-1                                  | Proteintech, 66220-1-Ig           | 1/4000          |
| Ki67                                        | Abcam, ab15580                    | 1/200           |
| pan Cytokeratin                             | Abcam, ab7753                     | 1/1000          |
| Human CD8                                   | Cell Signaling Technology, #85336 | 1/100           |
| Mouse CD8                                   | Cell Signaling Technology, #98941 | 1/200           |
