# Supplementary figures and images for: 新《企业所得税税法》与新《所得税会计准则》差异刍议
Source: HighWire-hosted journal article supplement (doi:10.1136/jitc-2022-005116), 2009-01-01

## Supplementary Figure S3

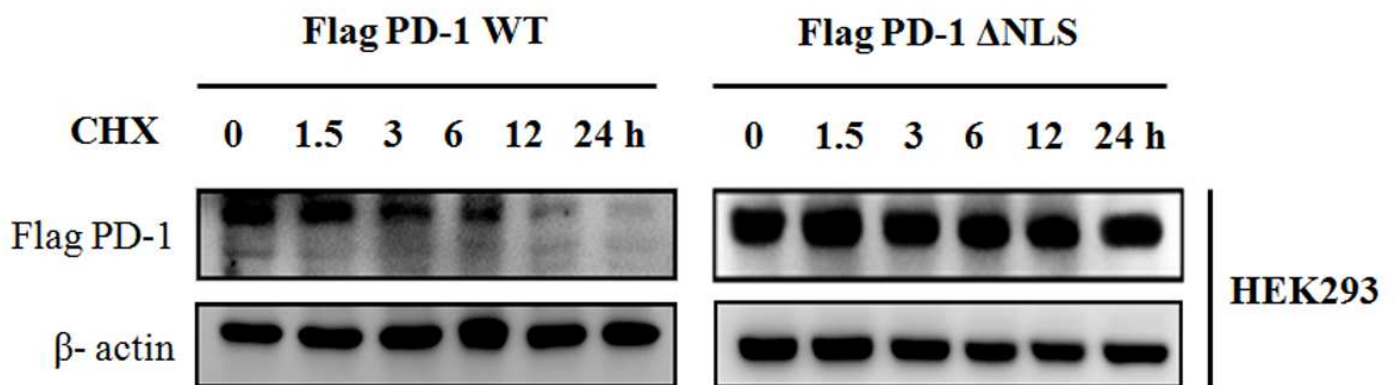

Supplement: jitc-2022-005116supp003_data_supplement.pdf [file jitc-2022-005116supp003_data_supplement.pdf]

## Supplementary Figure S5

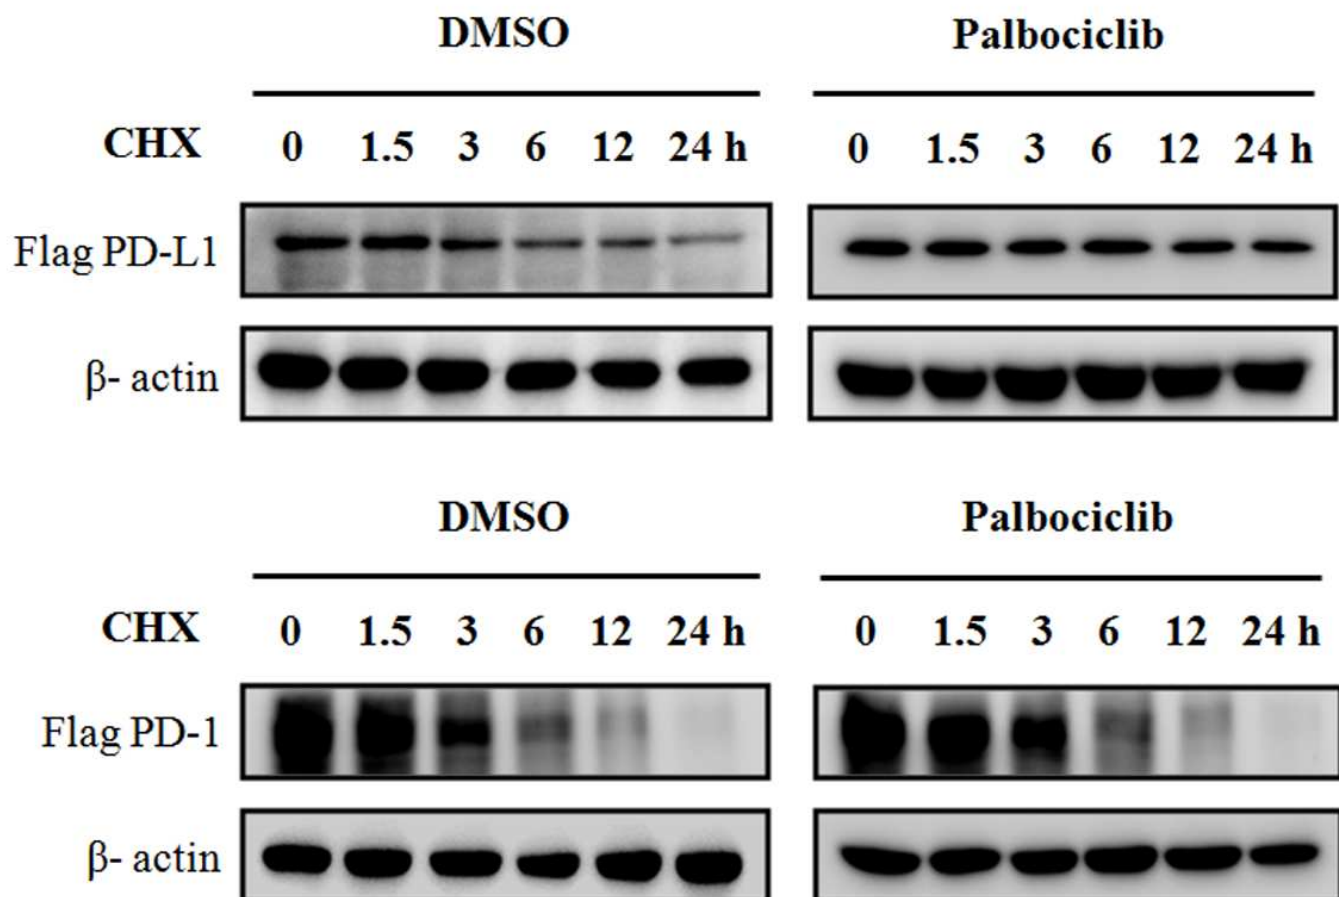

Supplement: jitc-2022-005116supp005_data_supplement.pdf [file jitc-2022-005116supp005_data_supplement.pdf]
